# Supplementary material for: The GOLIATH Project: Towards an Internationally Harmonised Approach for Testing Metabolism Disrupting Compounds
Source: PubMed Central journal article supplement (PMC7279023; doi:10.3390/ijms21103480), 2020-05-14

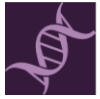

*Project report*

# **The GOLIATH project: Towards Internationally Harmonised Approaches for Testing Metabolism Disrupting Compounds**

*SUPPLEMENTARY TABLES AND FIGURES*

Supplementary Table 1: Overview of the reported associations between (early life) exposure to the initial set of GOLIATH chemicals and metabolic disorders in human epidemiological studies. For PFOA, TCS, p,p'-DDE, and BPA, studies of 2016 onwards were selected.

| Chemical | Endpoint                  | Epidemiologic design                      | Population                              | Statistically significant associations / Findings                                                                                                                                         | First Author + Year of publication |
|----------|---------------------------|-------------------------------------------|-----------------------------------------|-------------------------------------------------------------------------------------------------------------------------------------------------------------------------------------------|------------------------------------|
| TBT      | Growth and Ponderal Index | Prospective (Outcome ~ TBT placenta)      | Newborns followed in childhood, Finland | Weight gain during the first three months of life (positive); no significant associations between placenta OTC concentrations and child length, weight or PI at any time point were found | Rantakokko, 2014 [1]               |
|          |                           |                                           |                                         |                                                                                                                                                                                           |                                    |
| PFOA     | Liver disease             | Cross-sectional                           | Adults, China                           | Serum adipocytokines: TNF-alpha (negative); CK18 M30 (positive)                                                                                                                           | Bassler, 2019 [2]                  |
| PFOA     | Gestational diabetes (GD) | Prospective: GD ~ PFOA in early pregnancy | Healthy US women                        | Positive association with GDM among women with a family history of T2D                                                                                                                    | Rahman, 2019 [3]                   |
| PFOA     | Overweight                | Cross-sectional                           | Adults, China                           | Higher prevalence of overweight and positive association with waist circumference, more pronounced in women                                                                               | Tian, 2019 [4]                     |

| <b>Chemical</b> | <b>Endpoint</b>                     | <b>Epidemiologic design</b>                                                      | <b>Population</b>                                            | <b>Statistically significant associations / Findings</b>                                                                                                                     | <b>First Author + Year of publication</b> |
|-----------------|-------------------------------------|----------------------------------------------------------------------------------|--------------------------------------------------------------|------------------------------------------------------------------------------------------------------------------------------------------------------------------------------|-------------------------------------------|
| <b>PFOA</b>     | <b>Lipids/lipoproteins</b>          | Cross-sectional                                                                  | NHANES 2005-2014, adults                                     | Total (positive) and LDL cholesterol (positive). Greater susceptibility to elevated total and LDL cholesterol in obese participants, with differences between men and women. | Jain, 2019 [5]                            |
| <b>PFOA</b>     | <b>Childhood adiposity</b>          | Meta-analysis of Prospective cohorts                                             | 10 cohort studies, N = 6076                                  | Childhood body mass index (positive)                                                                                                                                         | Liu, 2019 [6]                             |
| <b>PFOA</b>     | <b>Birth antropometric measures</b> | Cross-sectional                                                                  | Newborns, US (KIDS)                                          | No significant associations                                                                                                                                                  | Bell, 2019 [7]                            |
| <b>PFOA</b>     | <b>Type 2 diabetes</b>              | Prospective cohort: T2D ~ dietary exposure                                       | Adults, France (E3N)                                         | U-shape association                                                                                                                                                          | Mancini, 2019 [8]                         |
| <b>PFOA</b>     | <b>Glucose related outcomes</b>     | Prospective birth cohort: outcome gestational week 28 ~ PFOA gestational week 11 | Pregnant women, Denmark (Odense Child Cohort)                | PFOA was not associated with glucose related outcomes (other PFASs were)                                                                                                     | Jensen, 2018 [9]                          |
| <b>PFOA</b>     | <b>Cord blood DNA methylation</b>   | Cross-sectional                                                                  | Mothers and newborns, Japan (Sappora cohort, Hokkaido Study) | DMP: ZBTB7A, USP2-AS1, TCP11L2, NTN1; DMR: ZFP57, CYP2E1, SMAD3, SLC17A9, GFPT2, DUSP22, and TCERG1L                                                                         | Miura, 2019 [10]                          |
| <b>PFOA</b>     | <b>Type 2 diabetes</b>              | Prospective nested case-control                                                  | Adults, US, NHSII                                            | Risk of type 2 diabetes (positive)                                                                                                                                           | Sun, 2018 [11]                            |

| Chemical | Endpoint                                                                                   | Epidemiologic design                                                                | Population                   | Statistically significant associations / Findings                                                                                                                                                                                                                                                                                                                                                                                                                                    | First Author + Year of publication |
|----------|--------------------------------------------------------------------------------------------|-------------------------------------------------------------------------------------|------------------------------|--------------------------------------------------------------------------------------------------------------------------------------------------------------------------------------------------------------------------------------------------------------------------------------------------------------------------------------------------------------------------------------------------------------------------------------------------------------------------------------|------------------------------------|
| PFOA     | Body weight and resting metabolic rate                                                     | Randomised clinical trial                                                           | Adults, US                   | Participants lost an average of 6.4 kg of body weight during the first 6 months (weight-loss period) and subsequently regained an average of 2.7 kg of body weight during the period of 6-24 months (weight regain period). Examine associations of PFAS exposure with changes in body weight and resting metabolic rate (RMR) in a diet-induced weight-loss setting. Higher baseline levels of PFASs were significantly associated with a greater weight regain, primarily in women | Liu, 2018 [12]                     |
| PFOA     | Lipids (total cholesterol, HDL, LDL) and alanine aminotransferase                          | Prospective cohort: outcome childhood ~ prenatal exposure maternal plasma pregnancy | Children, US                 | Higher TC and LDL in girls; Higher ALT in boys and girls; Lower ALT in boys and girls (the latter two predict better cardiovascular health)                                                                                                                                                                                                                                                                                                                                          | Mora, 2018 [13]                    |
| PFOA     | Metabolic outcomes: impaired glucose tolerance (IGT), gestational diabetes mellitus (GDM), | Prospective/cross-sectional: outcome ~PFOA 1st trimester                            | Pregnant women, Spain (INMA) | total cholesterol (positive)                                                                                                                                                                                                                                                                                                                                                                                                                                                         | Matilla-Santander, 2018 [14]       |

| Chemical | Endpoint                                                                                       | Epidemiologic design | Population                            | Statistically significant associations / Findings                                                                                                                                                                                                                                                                                                                                    | First Author + Year of publication |
|----------|------------------------------------------------------------------------------------------------|----------------------|---------------------------------------|--------------------------------------------------------------------------------------------------------------------------------------------------------------------------------------------------------------------------------------------------------------------------------------------------------------------------------------------------------------------------------------|------------------------------------|
|          | first-trimester serum levels of triglycerides, total cholesterol, and C-reactive protein (CRP) |                      |                                       |                                                                                                                                                                                                                                                                                                                                                                                      |                                    |
| PFOA     | Metabolic Syndrome                                                                             | Cross-sectional      | Adults, China                         | increased risk of metabolic syndrome, systolic blood pressure (positive), hypertriglyceridemia (positive), obesity (positive)                                                                                                                                                                                                                                                        | Yang, 2018 [15]                    |
| PFOA     | Bone density; cardio-metabolic risk factors                                                    | Cross-sectional      | Children, 2017                        | Total and LDL cholesterol (positive)                                                                                                                                                                                                                                                                                                                                                 | Khalil, 2017 [16]                  |
| PFOA     | Glycemic indicators and diabetes index                                                         | Prospective          | Diabetes Prevention Program Trial, US | Evaluated adjusted associations for plasma PFAS concentrations with diabetes incidence and key glycemic indicators measured at baseline and annually over up to 4.6 y. Baseline: homeostatic model assessment of insulin resistance (HOMA-IR) (positive); $\beta$ -cell function (HOMA- $\beta$ ) (positive); fasting proinsulin (positive); glycated hemoglobin (HbA1c) (prositive) | Cardenas, 2017 [17]                |

| <b>Chemical</b> | <b>Endpoint</b>                                                      | <b>Epidemiologic design</b>               | <b>Population</b>                        | <b>Statistically significant associations / Findings</b>                                                                                                                                                                                                                                                                                                                                                                    | <b>First Author + Year of publication</b> |
|-----------------|----------------------------------------------------------------------|-------------------------------------------|------------------------------------------|-----------------------------------------------------------------------------------------------------------------------------------------------------------------------------------------------------------------------------------------------------------------------------------------------------------------------------------------------------------------------------------------------------------------------------|-------------------------------------------|
| <b>PFOA</b>     | <b>Weight gain; BMI;<br/>Waist circumference;<br/>blood pressure</b> | Prospective                               | Childran, Spain (INMA)                   | Little or no evidence of associations between low prenatal PFAS exposures and outcomes related to cardiometabolic risk in a cohort of Spanish children followed from birth until 7 y                                                                                                                                                                                                                                        | Manzano-Salgado, 2017 [18]                |
| <b>PFOA</b>     | <b>Biochemistry profiles of metabolic syndrome</b>                   | Cross-sectional                           | Adults, US (NHANES 2013-2014)            | Increased linear PFOA was associated with increases in total cholesterol, serum albumin and an enhancement of beta cell function as well as a decrease in the serum globulin. Increased branched PFOA was significantly associated with increased fasting glucose. All isomers of PFOA were positively associated with high-density lipoprotein-cholesterol (HDL-C) and negatively associated with glycohemoglobin (HbA1C). | Liu, 2018 [19]                            |
| <b>PFOA</b>     | <b>Birth antropometric outcomes and maternal glucose and lipids</b>  | Prospective: Outcome ~ PFOA mid pregnancy | Mothers and newborns, US (Healthy Start) | Birth weight (negative); Adipositiy (negative); maternal glucose mid pregnancy (negative). Mediation effect of maternal glucose on                                                                                                                                                                                                                                                                                          | Starling, 2017 [20]                       |

| <b>Chemical</b> | <b>Endpoint</b>                         | <b>Epidemiologic design</b>                                   | <b>Population</b>                                                             | <b>Statistically significant associations / Findings</b>                                                                                                             | <b>First Author + Year of publication</b> |
|-----------------|-----------------------------------------|---------------------------------------------------------------|-------------------------------------------------------------------------------|----------------------------------------------------------------------------------------------------------------------------------------------------------------------|-------------------------------------------|
|                 |                                         |                                                               |                                                                               | association between PFAS and neonatal adiposity                                                                                                                      |                                           |
| <b>PFOA</b>     | <b>DNA methylation cord blood</b>       | Prospective: Outcome ~ PFOA mid pregnancy                     | Mothers and newborns, US                                                      | among top20 genes: RASA3; OPRD1                                                                                                                                      | Kingsley, 2017 [21]                       |
| <b>PFOA</b>     | <b>Body fat at age 9 in girls</b>       | Prospective: Outcome ~ PFOA maternal mid pregnancy            | Mothers and children, UK (Avon)                                               | BF age 9 (positive)                                                                                                                                                  | Hartman, 2017 [22]                        |
| <b>PFOA</b>     | <b>Fetal growth</b>                     | Prospective case-cohort: outcome ~PFOA early second trimester | Mothers and newborns, Sweden and Norway                                       | Higher odds for small for gestational age (SGA) birth                                                                                                                | Lauritzen, 2017 [23]                      |
| <b>PFOA</b>     | <b>Cord blood transcriptome</b>         | Cross-sectional                                               | Newborns, Belgium                                                             | Transcription factor enrichment analysis: Progesteron Receptor Signaling; Gene: ICA1; Cell signaling: Natural killar cell signaling                                  | Remy, 2016 [24]                           |
| <b>PFOA</b>     | <b>Metabolic function</b>               | Prospective (Outcome ~ PFOA early pregnancy)                  | Mothers and children, US (Project Viva)                                       | HOMA-IR (negative), more pronounced in females                                                                                                                       | Fleish, 2017 [25]                         |
| <b>PFOA</b>     | <b>Adiposity and glucose metabolism</b> | Prospective                                                   | Children followed until young adulthood, Denmark (European Youth Heart Study) | PFOA exposure in childhood was associated with decreased $\beta$ -cell function at 15 years of age. No associations observed between exposure during adolescence and | Domazet, 2016 [26]                        |

| <b>Chemical</b> | <b>Endpoint</b>                       | <b>Epidemiologic design</b>                  | <b>Population</b>                       | <b>Statistically significant associations / Findings</b>                                                                                                                                                | <b>First Author + Year of publication</b> |
|-----------------|---------------------------------------|----------------------------------------------|-----------------------------------------|---------------------------------------------------------------------------------------------------------------------------------------------------------------------------------------------------------|-------------------------------------------|
|                 |                                       |                                              |                                         | indicators of adiposity and glucose metabolism in young adulthood.                                                                                                                                      |                                           |
| <b>PFOA</b>     | <b>Adiposity</b>                      | Prospective (Outcome ~ PFOA early pregnancy) | Mothers and children, US (Project Viva) | In girls, mid childhood (7 years): Body mass index (positive), subscapular and triceps skinfold thickness (positive), DXA total fat mass index (positive); no associations for boys and early childhood | Mora, 2017 [27]                           |
| <b>PFOA</b>     | <b>Beta cell deficient diabetes</b>   | Cross-sectional                              | Adults, US (C8 health project)          | Diabetes (negative), strongest for type 1 diabetes                                                                                                                                                      | Conway, 2016 [28]                         |
| <b>PFOA</b>     | <b>Glucose tolerance and diabetes</b> | Cross-sectional                              | Adults, Taiwan                          | Potential protective effect against glucose intolerance and the risk of diabetes                                                                                                                        | Su, 2016 [29]                             |
| <b>PFOA</b>     | <b>Adiposity</b>                      | Prospective (Outcome ~ PFOA pregnancy)       | Mothers and children, US (HOME study)   | Adiposity 8y (positive), waist circumference 8y (positive), BMI gain 2y-8y (positive)                                                                                                                   | Braun, 2016 [30]                          |
|                 |                                       |                                              |                                         |                                                                                                                                                                                                         |                                           |



| <b>Chemical</b> | <b>Endpoint</b>                                   | <b>Epidemiologic design</b>                                                                                 | <b>Population</b>                    | <b>Statistically significant associations / Findings</b>                                                                                                                                                                                                                                                            | <b>First Author + Year of publication</b> |
|-----------------|---------------------------------------------------|-------------------------------------------------------------------------------------------------------------|--------------------------------------|---------------------------------------------------------------------------------------------------------------------------------------------------------------------------------------------------------------------------------------------------------------------------------------------------------------------|-------------------------------------------|
| TCS             | <b>Blood pressure (BP)</b>                        | Prospective birth cohort (Outcome and TCS measured in 3 trimesters of pregnancy)                            | Pregnant women, China                | In the women carrying male fetuses, urinary TCS concentrations were associated with a slight change of SBP during pregnancy. In the women carrying female fetuses, no chemical was associated with SBP, while urinary concentration of triclosan was inversely associated with DBP, though the magnitude was small. | Liu, 2019 [31]                            |
| TCS             | <b>Fetal and early childhood growth</b>           | Prospective birth cohort (Outcome ~ TCS 3 trimesters of pregnancy)                                          | Mothers and children, China          | Girls: third-trimester estimated fetal weight (increase), 2 year-old weight z-score (increase); early and middle stage of pregnancy may be the windows of vulnerability                                                                                                                                             | Wu, 2019 [32]                             |
| TCS             | <b>Child adiposity</b>                            | Prospective birth cohort (Outcome at 8 y ~ TCS during pregnancy and annually from 1-5 years and at 8 years) | Mothers and children, US             | Girls: Child adiposity at 8y ~ Prenatal triclosan                                                                                                                                                                                                                                                                   | Kaloo, 2018 [33]                          |
| TCS             | <b>Gestational diabetes (GD) and birth weight</b> | Cross-sectional                                                                                             | Pregnant women, China                | Birth weight (positive, female infants)                                                                                                                                                                                                                                                                             | Ouyang, 2018 [34]                         |
| TCS             | <b>Fetal growth</b>                               | Prospective birth cohort (Outcome ~ TCS during                                                              | Mothers and newborns, US (LIFECODES) | Estimated fetal weight and birth weight (negative, male infants)                                                                                                                                                                                                                                                    | Ferguson, 2018 [35]                       |

| <b>Chemical</b> | <b>Endpoint</b>                                                                                                       | <b>Epidemiologic design</b>                                        | <b>Population</b>                                   | <b>Statistically significant associations / Findings</b>                                                                                                                     | <b>First Author + Year of publication</b> |
|-----------------|-----------------------------------------------------------------------------------------------------------------------|--------------------------------------------------------------------|-----------------------------------------------------|------------------------------------------------------------------------------------------------------------------------------------------------------------------------------|-------------------------------------------|
|                 |                                                                                                                       | pregnancy)                                                         |                                                     |                                                                                                                                                                              |                                           |
| <b>TCS</b>      | <b>Gestational diabetes, impaired glucose tolerance, gestational weight gain, fetal markers of metabolic function</b> | Prospective birth cohort (Outcome ~ TCS first trimester pregnancy) | Mothers and newborns, Canada (MIREC)                | No support of an association between triclosan concentrations in pregnancy and fetal metabolic markers, glucose disorders of pregnancy, or excessive gestational weight gain | Shapiro, 2018 [36]                        |
| <b>TCS</b>      | <b>Birth outcomes</b>                                                                                                 | Cross-sectional                                                    | Mothers and newborns, China                         | No statistically significant associations after adjustment for covariates                                                                                                    | Huo, 2018 [37]                            |
| <b>TCS</b>      | <b>Adiposity</b>                                                                                                      | Prospective (Outcome up to 15 years ~ TCS 6-8y)                    | Children followed until 15 y, US                    | Adiposity (positivity, only among overweight girls)                                                                                                                          | Deierlein, 2017 [38]                      |
| <b>TCS</b>      | <b>Birth outcomes</b>                                                                                                 | Prospective (Outcome ~ TCS 3rd trimester pregnancy)                | Mothers and newborns, US                            | No associations observed for TCS                                                                                                                                             | Geer, 2017 [39]                           |
| <b>TCS</b>      | <b>Childhood fat mass</b>                                                                                             | Prospective (Outcome ~ TCS 3rd trimester pregnancy)                | Mothers and children, US                            | No association observed for TCS                                                                                                                                              | Buckley, 2016 [40]                        |
| <b>TCS</b>      | <b>Birth anthropometric measures</b>                                                                                  | Prospective (Outcome ~ TCS pregnancy)                              | Mothers and newborns, Denmark (Odense Child Cohort) | Head circumference (negative, boys); abdominal circumference (negative, borderline significant boys)                                                                         | Lassen, 2017 [41]                         |
|                 |                                                                                                                       |                                                                    |                                                     |                                                                                                                                                                              |                                           |

| Chemical | Endpoint                         | Epidemiologic design                                        | Population                                           | Statistically significant associations / Findings                                                                                  | First Author + Year of publication |
|----------|----------------------------------|-------------------------------------------------------------|------------------------------------------------------|------------------------------------------------------------------------------------------------------------------------------------|------------------------------------|
| p,p'-DDE | Blood pressure; hypertension     | Repeated measures of Outcome and Exposure 10 years apart    | Adults, Sweden (Västerbotten Intervention Programme) | DDE levels were significantly associated with odds of hypertension when BMI was not included in the model as a covariate.          | Donat-Vargas, 2018 [42]            |
| p,p'-DDE | Type 2 Diabetes                  | Prospective (Outcome ~p,p'-DDE 11 years earlier)            | Adults, US (Nurses' Health Study II)                 | T2D (positive, upper vs lower tertile exposure)                                                                                    | Zong, 2018 [43]                    |
| p,p'-DDE | Body weight; body composition    | Prospective (Outcome 1-2 y ~ p,p'-DDE mother near delivery) | Children, South Africa (VHEMBE)                      | p,p'-DDT, girls: body composition (positive); body weight (positive)                                                               | Coker, 2018 [44]                   |
| p,p'-DDE | Obesity                          | Prospective (Outcome 70-75-80y ~ Exposure 70y)              | Adults, Sweden (PIVUS)                               | Fasting glucose (positive), BMI (positive), hypertension (positive)                                                                | La Merrill, 2018 [45]              |
| p,p'-DDE | Obesity                          | Systematic Review; Meta-analysis                            | 7 Prospective Studies for meta-analysis              | BMI z-score (positive)                                                                                                             | Cano-Sancho, 2017 [46]             |
| p,p'-DDE | Adiposity                        | Prospective (Outcome 12y ~ p,p'-DDE prenatal mother)        | Children, US (CHAMACOS)                              | 12y, boys: o,p'-DDT, p,p'-DDT, and p,p'-DDE: BMI z-score (positive)                                                                | Warner, 2017 [47]                  |
| p,p'-DDE | Metabolic Syndrome               | Cross-sectional                                             | Adults, US (Anniston Community Health Survey)        | Metabolic Syndrome (positive, for p,p'-DDT across multiple quintiles; for p,p'-DDE for the highest quintile relative to the first) | Rosenbaum, 2017 [48]               |
| p,p'-DDE | Gestational diabetes, birth size |                                                             | Pregnant women, Faroe Islands                        | Gestational diabetes (positive); head circumference (positive)                                                                     | Valvi, 2017 [49]                   |

| <b>Chemical</b> | <b>Endpoint</b>                                             | <b>Epidemiologic design</b> | <b>Population</b>                                  | <b>Statistically significant associations / Findings</b>                                                                                                                                                      | <b>First Author + Year of publication</b> |
|-----------------|-------------------------------------------------------------|-----------------------------|----------------------------------------------------|---------------------------------------------------------------------------------------------------------------------------------------------------------------------------------------------------------------|-------------------------------------------|
| <b>p,p'-DDE</b> | <b>Diabetes</b>                                             | Cross-sectional             | Adults, Canadian Arctic, Adult Inuit Health Survey | Diabetes (positive, highest versus mowest quartile); Fasting glucose (positive, highest versus mowest quartile)                                                                                               | Singh, 2017 [50]                          |
| <b>p,p'-DDE</b> | <b>Disruption adipose tissue oxidative microenvironment</b> | Cross-sectional             | > 16 years, Spain                                  | lipid peroxidation (TBARS, positive); SOD activity (positive)                                                                                                                                                 | Artacho-Cordón, 2016 [51]                 |
| <b>p,p'-DDE</b> | <b>Birth Outcomes</b>                                       | Cross-sectional             | Newborns, China                                    | birth weigth (positive)                                                                                                                                                                                       | Xu, 2017 [52]                             |
| <b>p,p'-DDE</b> | <b>Metabolomics</b>                                         | Intervention study          | Adults, UK (FoodCAP research project)              | Sphingolipids and Glycerophospholipids lipids families were identified and found significantly ( $p < 0.05$ ) different between high and low POPs exposure levels.                                            | Carrizo, 2017 [53]                        |
| <b>p,p'-DDE</b> | <b>Infant growth</b>                                        | Cross-sectional             | Mothers and newborns, Australia                    | For the first time no significant association was found between p,p'-DDE concentrations in human milk and infant growth outcomes such as weight, length, head circumference and percentage fat mass. (N = 40) | Du, 2017 [54]                             |

| <b>Chemical</b> | <b>Endpoint</b>                   | <b>Epidemiologic design</b> | <b>Population</b>              | <b>Statistically significant associations / Findings</b>                                                                                                                                                    | <b>First Author + Year of publication</b> |
|-----------------|-----------------------------------|-----------------------------|--------------------------------|-------------------------------------------------------------------------------------------------------------------------------------------------------------------------------------------------------------|-------------------------------------------|
| <b>p,p'-DDE</b> | <b>Cord blood transcriptome</b>   | Cross-sectional             | Newborns, Belgium              | Transcription factor enrichment analysis: Glucocorticoid Receptor; Pathway Enrichment: 'insulin receptor signaling', 'acute phase response signaling', 'Interleukin(IL)-6 signaling', 'prolactin signaling' | Remy, 2016 [24]                           |
| <b>p,p'-DDE</b> | <b>Diabetes</b>                   | Cross-sectional             | Adults, US                     | Differences in diabetes prevalence between quartiles of exposure                                                                                                                                            | Aminov, 2016 [55]                         |
| <b>p,p'-DDE</b> | <b>Metabolomics</b>               | Cross-sectional             | Adults, Sweden (PIVUS)         | The majority of the significant metabolites belong to lipid metabolism pathways and include fatty acids, glycerophospholipids, sphingolipids, and glycerolipids.                                            | Salihovic, 2016 [56]                      |
|                 |                                   |                             |                                |                                                                                                                                                                                                             |                                           |
| <b>BPA</b>      | <b>Cardiometabolic impairment</b> | Case-control                | Children and adolescents, Iran | Higher odds ratio of cardiometabolic risk factors                                                                                                                                                           | Mansouri, 2019 [57]                       |
| <b>BPA</b>      | <b>Type 2 diabetes</b>            | Case-control                | Adults, India                  | Serum levels of BPA were significantly higher in patients with T2DM compared to control individuals and positively correlated to poor glycemic control and insulin resistance.                              | Soundararajan, 2019 [58]                  |

| <b>Chemical</b> | <b>Endpoint</b>           | <b>Epidemiologic design</b>                                   | <b>Population</b>                                                              | <b>Statistically significant associations / Findings</b>                                                                     | <b>First Author + Year of publication</b> |
|-----------------|---------------------------|---------------------------------------------------------------|--------------------------------------------------------------------------------|------------------------------------------------------------------------------------------------------------------------------|-------------------------------------------|
| <b>BPA</b>      | <b>Birth outcomes</b>     | Prospective (Outcome ~ BPA third trimester mother)            | Mothers and newborns, Taiwan                                                   | neonatal head circumference (marginally significant)                                                                         | Chang, 2019 [59]                          |
| <b>BPA</b>      | <b>Metabolic syndrome</b> | Cross-sectional                                               | Adults, South Korea (Korean National Environmental Health Survey II 2012-2014) | Metabolic syndrome (negative)                                                                                                | Shim, 2019 [60]                           |
| <b>BPA</b>      | <b>Glucose</b>            | Cross-sectional                                               | Adults, China (e-waste recycling and reference area)                           | Results suggest BPA exposure might be associated with abnormal fasting blood glucose in participants living in e-waste sites | Song, 2019 [61]                           |
| <b>BPA</b>      | <b>Type 2 diabetes</b>    | Case-control                                                  | Adults, China                                                                  | Type 2 diabetes (positive for 2nd and 3rd quartile, but not for 4th quartile)                                                | Duan, 2018 [62]                           |
| <b>BPA</b>      | <b>Type 2 diabetes</b>    | Meta-analysis                                                 | 16 studies; 41,320 subjects                                                    | Type 2 diabetes (positive)                                                                                                   | Hwang, 2018 [63]                          |
| <b>BPA</b>      | <b>Type 1 diabetes</b>    | Case-control                                                  | Children, Turkey                                                               | No significant association with T1D; Birth Weight (negative)                                                                 | Rahmani, 2018 [64]                        |
| <b>BPA</b>      | <b>Type 2 diabetes</b>    | Case-control                                                  | Adults, Saudi Arabia                                                           | Type 2 diabetes (positive (3rd quartile)                                                                                     | Li, 2018 [65]                             |
| <b>BPA</b>      | <b>Insulin resistance</b> | Intervention study (not wearing and do wearing gloves 1 week) | Women, Korea (Cashiers)                                                        | Insulin (positive); Insulin resistance (positive); wearing gloves shown to be protective for exposure levels                 | Lee, 2018 [66]                            |

| <b>Chemical</b> | <b>Endpoint</b>              | <b>Epidemiologic design</b>                     | <b>Population</b>                                                                  | <b>Statistically significant associations / Findings</b>                                                                                                 | <b>First Author + Year of publication</b> |
|-----------------|------------------------------|-------------------------------------------------|------------------------------------------------------------------------------------|----------------------------------------------------------------------------------------------------------------------------------------------------------|-------------------------------------------|
| <b>BPA</b>      | <b>Glucose levels</b>        | Prospective (Outcome ~ BPA 1st & 2nd trimester) | Pregnant women, US (Lifecodes pregnancy cohort)                                    | No associations in the overall population. Moderately high BPA concentrations were associated with increased glucose levels among overweight/obese women | Bellavia, 2018 [67]                       |
| <b>BPA</b>      | <b>Type 2 diabetes</b>       | Prospective nested case-control study           | Adults, China (environment, inflammation and metabolic diseases study (2008-2013)) | BPA is not associated with a 5-year T2D incidence.                                                                                                       | Shu, 2018 [68]                            |
| <b>BPA</b>      | <b>Gestational Diabetes</b>  | Prospective                                     | Mothers and newborns, China                                                        | Gestational Diabetes (negative); birth weight (negative); ponderal index (negative)                                                                      | Wang, 2017 [69]                           |
| <b>BPA</b>      | <b>Glucose levels</b>        | Prospective                                     | Subfertile pregnant women, US                                                      | Blood glucose (positive)                                                                                                                                 | Chiu, 2017 [70]                           |
| <b>BPA</b>      | <b>Metabolic syndrome</b>    | Cross-sectional                                 | Adults, Prague                                                                     | There was no significant relation of bisphenol A level to diabetes, hypertension, dyslipidemia, age, and BMI.                                            | Piecha, 2017 [71]                         |
| <b>BPA</b>      | <b>Diabetes</b>              | Cross-sectional                                 | Adult men, Canada                                                                  | glycated hemoglobin (HbA1c, positive), diabetes melitus (positive)                                                                                       | Stojanoska, 2017 [72]                     |
| <b>BPA</b>      | <b>Metabolism biomarkers</b> | Prospective (Outcome ~ BPA pregnancy and at     | Children 8-14y, Mexico (ELEMENT)                                                   | Leptin (positive, boys)                                                                                                                                  | Watkins, 2016 [73]                        |

| <b>Chemical</b> | <b>Endpoint</b> | <b>Epidemiologic design</b> | <b>Population</b> | <b>Statistically significant associations / Findings</b> | <b>First Author + Year of publication</b> |
|-----------------|-----------------|-----------------------------|-------------------|----------------------------------------------------------|-------------------------------------------|
|                 |                 | follow-up)                  |                   |                                                          |                                           |





| Chemical | CAS Number | Study Acronym + link IPCHEM metadata page | Year      | Matrix            | Unit of Measure | N   | N Below LOD/LOQ | FREQ sex                          | Population | P05  | P10  | P25  | P50  | P75  | P90  | P95  |
|----------|------------|-------------------------------------------|-----------|-------------------|-----------------|-----|-----------------|-----------------------------------|------------|------|------|------|------|------|------|------|
| PFOA     | 335-67-1   | FLEHS 2 Ref Nb                            | 2008-2009 | Cord blood-plasma | µg/L            | 220 | 0               | FEMALE , N = 109 ; MALE , N = 111 | Newbornw   | 0.80 | 0.90 | 1.10 | 1.50 | 2.00 | 2.50 | 2.91 |
| PFOA     | 335-67-1   | FLEHS 3 Ref Nb                            | 2013-2014 | Cord blood-plasma | µg/L            | 269 | 0               | FEMALE , N = 130 ; MALE , N = 139 | Newbornw   | 0.48 | 0.64 | 0.89 | 1.27 | 1.57 | 2.14 | 2.40 |
| PFOA     | 335-67-1   | FLEHS 2 Hotspot M                         | 2010-2011 | Blood Serum       | µg/L            | 197 | 0               | FEMALE , N = 83 ; MALE , N = 114  | Teenagers  | 1.52 | 1.77 | 2.13 | 2.60 | 3.00 | 3.60 | 3.98 |
| PFOA     | 335-67-1   | FLEHS 2 Ref Adult                         | 2008-2009 | Blood Serum       | µg/L            | 201 | 0               | FEMALE , N = 107 ; MALE , N = 94  | Adults     | 1.20 | 1.70 | 2.50 | 3.50 | 4.50 | 5.80 | 6.30 |
| PFOA     | 335-67-1   | FLEHS 3 Ref Adult                         | 2014      | Blood Serum       | µg/L            | 205 | 0               | FEMALE , N = 108 ; MALE , N = 97  | Adults     | 1.20 | 1.59 | 2.13 | 2.94 | 3.69 | 4.89 | 6.31 |

| Chemical | CAS Number | Study Acronym + link IPCHEM metadata page | Year      | Matrix            | Unit of Measure | N    | N Below LOD/LOQ | FREQ sex                          | Population | P05  | P10  | P25  | P50  | P75  | P90  | P95  |
|----------|------------|-------------------------------------------|-----------|-------------------|-----------------|------|-----------------|-----------------------------------|------------|------|------|------|------|------|------|------|
| p,p'-DDE | 72-55-9    | FLEHS 1 Ref Nb                            | 2002-2004 | Cord blood-plasma | µg/L            | 1114 | 20              | FEMALE , N = 532 ; MALE , N = 582 | Newborns   | 0.05 | 0.07 | 0.13 | 0.22 | 0.38 | 0.62 | 0.91 |
| p,p'-DDE | 72-55-9    | FLEHS 1 Ref Nb                            | 2002-2004 | Cord blood-plasma | µg/g lipid      | 1112 | 20              | FEMALE , N = 532 ; MALE , N = 580 | Newborns   | 0.03 | 0.04 | 0.06 | 0.11 | 0.19 | 0.33 | 0.51 |
| p,p'-DDE | 72-55-9    | FLEHS 2 Ref Nb                            | 2008-2009 | Cord blood-plasma | µg/L            | 253  | 0               | FEMALE , N = 125 ; MALE , N = 128 | Newborns   | 0.06 | 0.07 | 0.09 | 0.15 | 0.24 | 0.38 | 0.52 |
| p,p'-DDE | 72-55-9    | FLEHS 2 Ref Nb                            | 2008-2009 | Cord blood-plasma | µg/g lipid      | 250  | 0               | FEMALE , N = 125 ; MALE , N = 125 | Newborns   | 0.03 | 0.03 | 0.05 | 0.07 | 0.13 | 0.20 | 0.27 |

| Chemical | CAS Number | Study Acronym + link IPCHEM metadata page | Year      | Matrix            | Unit of Measure | N    | N Below LOD/LOQ | FREQ sex                          | Population | P05  | P10  | P25  | P50  | P75  | P90  | P95  |
|----------|------------|-------------------------------------------|-----------|-------------------|-----------------|------|-----------------|-----------------------------------|------------|------|------|------|------|------|------|------|
| p,p'-DDE | 72-55-9    | FLEHS 3 Ref Nb                            | 2013-2014 | Cord blood-plasma | µg/L            | 276  | 0               | FEMALE , N = 135 ; MALE , N = 141 | Newborns   | 0.04 | 0.05 | 0.06 | 0.10 | 0.16 | 0.29 | 0.49 |
| p,p'-DDE | 72-55-9    | FLEHS 3 Ref Nb                            | 2013-2014 | Cord blood-plasma | µg/g lipid      | 273  | 0               | FEMALE , N = 134 ; MALE , N = 139 | Newborns   | 0.02 | 0.03 | 0.04 | 0.06 | 0.09 | 0.14 | 0.27 |
| p,p'-DDE | 72-55-9    | FLEHS 1 Ref Ado                           | 2003-2004 | Blood Serum       | µg/L            | 1653 | 1               | FEMALE , N = 778 ; MALE , N = 875 | Teenagers  | 0.15 | 0.19 | 0.27 | 0.41 | 0.72 | 1.50 | 2.30 |
| p,p'-DDE | 72-55-9    | FLEHS 1 Ref Ado                           | 2003-2004 | Blood Serum       | µg/g lipid      | 1653 | 1               | FEMALE , N = 778 ; MALE , N = 875 | Teenagers  | 0.03 | 0.04 | 0.06 | 0.09 | 0.16 | 0.33 | 0.52 |
| p,p'-DDE | 72-55-9    | FLEHS 2 Hotspot GenkZ                     | 2010      | Blood Serum       | µg/L            | 196  | 0               | FEMALE , N = 107 ; MALE , N = 89  | Teenagers  | 0.08 | 0.10 | 0.13 | 0.19 | 0.30 | 0.54 | 0.75 |

| Chemical | CAS Number | Study Acronym + link IPCHEM metadata page | Year      | Matrix      | Unit of Measure | N   | N Below LOD/LOQ | FREQ sex                         | Population | P05  | P10  | P25  | P50  | P75  | P90  | P95  |
|----------|------------|-------------------------------------------|-----------|-------------|-----------------|-----|-----------------|----------------------------------|------------|------|------|------|------|------|------|------|
| p,p'-DDE | 72-55-9    | FLEHS 2 Hotspot GenkZ                     | 2010      | Blood Serum | µg/g lipid      | 196 | 0               | FEMALE , N = 107 ; MALE , N = 89 | Teenagers  | 0.02 | 0.02 | 0.03 | 0.04 | 0.07 | 0.11 | 0.18 |
| p,p'-DDE | 72-55-9    | FLEHS 2 Hotspot M                         | 2010-2011 | Blood Serum | µg/L            | 197 | 0               | FEMALE , N = 83 ; MALE , N = 114 | Teenagers  | 0.08 | 0.10 | 0.13 | 0.19 | 0.32 | 0.54 | 0.75 |
| p,p'-DDE | 72-55-9    | FLEHS 2 Hotspot M                         | 2010-2011 | Blood Serum | µg/g lipid      | 197 | 0               | FEMALE , N = 83 ; MALE , N = 114 | Teenagers  | 0.02 | 0.02 | 0.03 | 0.04 | 0.07 | 0.11 | 0.17 |
| p,p'-DDE | 72-55-9    | FLEHS 2 Ref Ado                           | 2008-2009 | Blood Serum | µg/L            | 210 | 0               | FEMALE , N = 89 ; MALE , N = 121 | Teenagers  | 0.12 | 0.13 | 0.18 | 0.26 | 0.46 | 0.79 | 1.22 |
| p,p'-DDE | 72-55-9    | FLEHS 2 Ref Ado                           | 2008-2009 | Blood Serum | µg/g lipid      | 208 | 0               | FEMALE , N = 88 ; MALE , N = 120 | Teenagers  | 0.02 | 0.03 | 0.04 | 0.06 | 0.11 | 0.19 | 0.30 |

| Chemical | CAS Number | Study Acronym + link IPCHEM metadata page | Year      | Matrix      | Unit of Measure | N    | N Below LOD/LOQ | FREQ sex                          | Population | P05  | P10  | P25  | P50  | P75  | P90  | P95   |
|----------|------------|-------------------------------------------|-----------|-------------|-----------------|------|-----------------|-----------------------------------|------------|------|------|------|------|------|------|-------|
| p,p'-DDE | 72-55-9    | FLEHS 3 Hotspot GKZ                       | 2013-2014 | Blood Serum | µg/L            | 199  | 0               | FEMALE , N = 99 ; MALE , N = 100  | Teenagers  | 0.07 | 0.08 | 0.12 | 0.19 | 0.35 | 0.93 | 1.40  |
| p,p'-DDE | 72-55-9    | FLEHS 3 Hotspot GKZ                       | 2013-2014 | Blood Serum | µg/g lipid      | 198  | 0               | FEMALE , N = 99 ; MALE , N = 99   | Teenagers  | 0.02 | 0.02 | 0.03 | 0.04 | 0.08 | 0.22 | 0.35  |
| p,p'-DDE | 72-55-9    | FLEHS 3 ref Ado                           | 2013      | Blood Serum | µg/L            | 205  | 1               | FEMALE , N = 111 ; MALE , N = 94  | Teenagers  | 0.06 | 0.09 | 0.12 | 0.20 | 0.35 | 0.77 | 1.09  |
| p,p'-DDE | 72-55-9    | FLEHS 3 ref Ado                           | 2013      | Blood Serum | µg/g lipid      | 205  | 1               | FEMALE , N = 111 ; MALE , N = 94  | Teenagers  | 0.02 | 0.02 | 0.03 | 0.05 | 0.08 | 0.16 | 0.28  |
| p,p'-DDE | 72-55-9    | FLEHS 1 Ref Adult                         | 2004-2005 | Blood Serum | µg/L            | 1577 | 6               | FEMALE , N = 803 ; MALE , N = 774 | Adults     | 0.54 | 0.82 | 1.60 | 2.92 | 5.60 | 9.95 | 13.00 |

| Chemical | CAS Number | Study Acronym + link IPCHEM metadata page | Year      | Matrix              | Unit of Measure | N    | N Below LOD/LOQ | FREQ sex                          | Population | P05  | P10  | P25  | P50  | P75  | P90   | P95    |
|----------|------------|-------------------------------------------|-----------|---------------------|-----------------|------|-----------------|-----------------------------------|------------|------|------|------|------|------|-------|--------|
| p,p'-DDE | 72-55-9    | FLEHS 1<br>Ref Adult                      | 2004-2005 | Blood Serum         | µg/g lipid      | 1577 | 6               | FEMALE , N = 803 ; MALE , N = 774 | Adults     | 0.09 | 0.14 | 0.27 | 0.49 | 0.91 | 1.58  | 2.15   |
| p,p'-DDE | 72-55-9    | FLEHS 3<br>Ref Adult                      | 2014      | Blood Serum         | µg/L            | 206  | 0               | FEMALE , N = 109 ; MALE , N = 97  | Adults     | 0.26 | 0.34 | 0.72 | 1.37 | 2.44 | 4.20  | 6.00   |
| p,p'-DDE | 72-55-9    | FLEHS 3<br>Ref Adult                      | 2014      | Blood Serum         | µg/g lipid      | 202  | 0               | FEMALE , N = 105 ; MALE , N = 97  | Adults     | 0.05 | 0.06 | 0.13 | 0.24 | 0.38 | 0.64  | 1.05   |
|          |            |                                           |           |                     |                 |      |                 |                                   |            |      |      |      |      |      |       |        |
| TCS      | 3380-34-5  | FLEHS 2<br>Ref Ado                        | 2008-2009 | Urine-morning urine | µg/L            | 197  | 0               | FEMALE , N = 84 ; MALE , N = 113  | Teenagers  | 0.22 | 0.30 | 0.56 | 1.29 | 4.89 | 63.52 | 152.49 |

| Chemical | CAS Number | Study Acronym + link IPCHEM metadata page | Year      | Matrix              | Unit of Measure                         | N   | N Below LOD/LOQ | FREQ sex                         | Population | P05  | P10  | P25  | P50  | P75  | P90   | P95    |
|----------|------------|-------------------------------------------|-----------|---------------------|-----------------------------------------|-----|-----------------|----------------------------------|------------|------|------|------|------|------|-------|--------|
| TCS      | 3380-34-5  | FLEHS 2 Ref Ado                           | 2008-2009 | Urine-morning urine | µg/g creatinine                         | 196 | 0               | FEMALE , N = 84 ; MALE , N = 112 | Teenagers  | 0.17 | 0.20 | 0.37 | 0.92 | 3.71 | 48.50 | 97.48  |
| TCS      | 3380-34-5  | FLEHS 2 Ref Ado                           | 2008-2009 | Urine-morning urine | µg/L adjusted for specific gravity (SG) | 196 | 0               | FEMALE , N = 84 ; MALE , N = 112 | Teenagers  | 0.27 | 0.33 | 0.62 | 1.35 | 5.16 | 68.32 | 166.97 |
| TCS      | 3380-34-5  | FLEHS 3 Ref Adult                         | 2014      | Urine-spot          | µg/L                                    | 194 | 23              | FEMALE , N = 101 ; MALE , N = 93 | Adults     |      |      | 0.18 | 0.39 | 1.30 | 12.08 | 46.12  |
| TCS      | 3380-34-5  | FLEHS 3 Ref Adult                         | 2014      | Urine-spot          | µg/g creatinine                         | 194 | 23              | FEMALE , N = 101 ; MALE , N = 93 | Adults     |      |      | 0.23 | 0.59 | 1.65 | 18.23 | 71.88  |



| Chemical | CAS Number | Study Acronym + link IPCHEM metadata page | Year | Matrix     | Unit of Measure                         | N   | N Below LOD/LOQ | FREQ sex                         | Population | P05 | P10 | P25  | P50  | P75  | P90   | P95    |
|----------|------------|-------------------------------------------|------|------------|-----------------------------------------|-----|-----------------|----------------------------------|------------|-----|-----|------|------|------|-------|--------|
| TCS      | 3380-34-5  | FLEHS 3 Ref Adult                         | 2014 | Urine-spot | µg/L adjusted for specific gravity (SG) | 194 | 23              | FEMALE , N = 101 ; MALE , N = 93 | Adults     |     |     | 0.35 | 0.73 | 2.11 | 20.53 | 103.60 |

Legend: N = Number of samples; LOD = Limit of Detection; LOQ = Limit of Quantification; FREQ = Frequency table; P05, P10, P25, P50, P75, P90, P95 = 5<sup>th</sup>, 10<sup>th</sup>, 25<sup>th</sup>, 50<sup>th</sup>, 75<sup>th</sup>, 90<sup>th</sup>, 95<sup>th</sup> percentile respectively

Supplementary Table 3: Human biomonitoring data on TBT and TPP obtained from literature.

| Chemical | CAS Number | Country Name | Year      | Population                               | Matrix               | Unit of Measure      | Number of Samples | Median | First Author + Year of Publication |
|----------|------------|--------------|-----------|------------------------------------------|----------------------|----------------------|-------------------|--------|------------------------------------|
| DPHP     | 838-85-7   | China        | 2016-2017 | e-waste dismantling area, pregnant women | Maternal Urine       | µg/L                 | 15                | 1.2    | Bai, 2019 [82]                     |
| DPHP     | 838-85-7   | China        | 2016-2017 | e-waste dismantling area, pregnant women | Amniotic Fluid       | µg/L                 | 15                | 0.18   | Bai, 2019 [82]                     |
| DPHP     | 838-85-7   | China        | 2016      | Children and adults                      | Urine, first morning | µg/L                 | 323               | 0.3    | Zhang, 2018 [83]                   |
| DPHP     | 838-85-7   | US           | 2016      | Toddlers                                 | Urine                | µg/L adjusted for SG | 21                | 3.4    | Thomas, 2017 [84]                  |
| DPHP     | 838-85-7   | US           | 2016      | Toddlers                                 | Urine                | µg/L adjusted for SG | 20                | 8.2    | Thomas, 2017 [84]                  |
| DPHP     | 838-85-7   | China        | 2015      | Pregnant women                           | Urine                | µg/L                 | 23                | 0.83   | Feng, 2016 [85]                    |
| TPP      | 115-86-6   | US           | 2014      | Adults                                   | Hair                 | ng/g                 | 50                | 220    | Liu, 2016 [86]                     |
| TPP      | 115-86-6   | US           | 2014      | Adults                                   | Fingernail           | ng/g                 | 50                | 370    | Liu, 2016 [86]                     |
| TPP      | 115-86-6   | US           | 2014      | Adults                                   | Toenail              | ng/g                 | 50                | 1080   | Liu, 2016 [86]                     |
|          |            |              |           |                                          |                      |                      |                   |        |                                    |
| TBT      | 1461-22-9  | US           | 1998      | Adults                                   | Blood                | µg/L                 | 32                | 5.8    | Kannan, 1999 [87]                  |
| TBT      | 1461-22-9  | Denmark      | 1997-2001 | Newborn                                  | Placenta             | ng/g fw              | 129               | 0.01   | Rantakokko, 2013 [88]              |

|     |           |         |           |         |          |         |    |      |                       |
|-----|-----------|---------|-----------|---------|----------|---------|----|------|-----------------------|
| TBT | 1461-22-9 | Finland | 1997-2001 | Newborn | Placenta | ng/g fw | 56 | 0.38 | Rantakokko, 2013 [88] |
|-----|-----------|---------|-----------|---------|----------|---------|----|------|-----------------------|

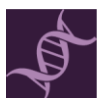

Supplementary Table 4. Examples of (Q)SAR models predicting activity related to nuclear receptors involved in metabolic disruption by MDCs

| Nuclear Receptor | Method                                                            | Dataset | Data type                                        | Chemical domain                              | statistics                                                                                    | references                   |
|------------------|-------------------------------------------------------------------|---------|--------------------------------------------------|----------------------------------------------|-----------------------------------------------------------------------------------------------|------------------------------|
| PPAR $\alpha$    | multiple linear regressions (MLR) and partial least squares (PLS) | 46      | pEC50                                            | phenylpropionic acid derivatives             | Training: R <sup>2</sup> = 0.784, Q <sup>2</sup> = 0.774, Test: R <sup>2</sup> = 0.841        | Verma and Chouhan, 2016 [89] |
|                  | Multivariate Data Analysis                                        | 71      | gene transactivation data (expressed as EC50)    | carboxylic acid derivatives                  | Training: R <sup>2</sup> = 0.721, Q <sup>2</sup> = 0.476, Blind test: Residuals $\Delta$ <1.5 | Vallianatou, 2013 [90]       |
| PPAR $\gamma$    | 3D-QSAR                                                           | 170     | pEC50                                            | PPAR $\gamma$ full agonists                  | Training: R <sup>2</sup> = 0.821, Q <sup>2</sup> = 0.610, Test: R <sup>2</sup> = 0.552        | Al Sharif, 2017 [91]         |
| PXR              | k-nearest neighbor (k-NN)                                         | 2724    | competing potency to hPXR                        | various chemicals                            | Training: Ac = 0,708 Sp= 0,704 Se= 0,702                                                      | Yin, 2017 [92]               |
|                  | partial logistic regression                                       | 631     | human PXR binding assay                          | environmental chemicals                      | Training: Ac = 0,835 Sp= 0,85 Se= 0,82 Test: Ac= 0,696 Sp=0,839 Se=0,579                      | Dybdahl, 2012 [93]           |
| CAR              | 3D-QSAR                                                           | 35      | reporter gene assay with HepG2 cells transfected | Various chemicals (including bisphenol A and | Training: R <sup>2</sup> = 0,99, Q <sup>2</sup> = 0.74, Test: R <sup>2</sup> = 0.71           | Kato, 2017 [94]              |

|              |                                                            |      |                                                                   |                                                                                                      |                                                                                                   |                       |
|--------------|------------------------------------------------------------|------|-------------------------------------------------------------------|------------------------------------------------------------------------------------------------------|---------------------------------------------------------------------------------------------------|-----------------------|
|              |                                                            |      | with a chimerical construct of hCAR (hCAR1pA                      | triphenyl phosphate)                                                                                 |                                                                                                   |                       |
| LXR $\alpha$ | multidimensional QSAR                                      | 52   | LXR binding affinity                                              | heterocyclic phenylacetic acid compounds and compounds derived from podocarpic acid                  | Training set: R <sup>2</sup> =0,849<br>Test set: R <sup>2</sup> =0,744                            | (Spreafico, 2010)[95] |
| LXR $\beta$  | stepwise method combined with linear discriminant analysis | 41   | ABCA1 promoter activation assay                                   | ABCA1 up-regulators                                                                                  | Within domain: Q = 100%,<br>Sp= 100%<br>Se= 100%                                                  | Chen, 2018a [96]      |
| FXR          | k-nearest neighbors based on molecular fingerprints        | 1224 | qHTS assays for agonists and antagonists of FXR                   | Various chemicals                                                                                    | Training: Ac = 0,76<br>Sp= 0,80<br>Se= 0,73<br>Test: Ac=0,79<br>Sp=0,77<br>Se=0,90                | Chen, 2018b [97]      |
|              | Structural fragments                                       | 103  | FXR- $\beta$ transactivation assay and FXR-SRC2 coactivator assay | ivermectin anthelmintics, dihydropyridine calcium channel blockers, 1,3-indandione rodenticides, and | area under the receiver operating characteristic (AUC-ROC) >0.78 (AUC $\leq$ 0.5 for random data) | Hsu, 2016 [98]        |

---

pyrethroid  
pesticides

---

Ac: predictive accuracy, Sp: specificity, Se: sensitivity

## References

1. Rantakokko, P.; Main, K.M.; Wohlfart-Veje, C.; Kiviranta, H.; Airaksinen, R.; Vartiainen, T.; Skakkebaek, N.E.; Toppari, J.; Virtanen, H.E. Association of placenta organotin concentrations with growth and ponderal index in 110 newborn boys from Finland during the first 18 months of life: A cohort study. *Environ. Heal. A Glob. Access Sci. Source* **2014**, *13*.
2. Bassler, J.; Ducatman, A.; Elliott, M.; Wen, S.; Wahlang, B.; Barnett, J.; Cave, M.C. Environmental perfluoroalkyl acid exposures are associated with liver disease characterized by apoptosis and altered serum adipocytokines. *Environ. Pollut.* **2019**.
3. Rahman, M.L.; Zhang, C.; Smarr, M.M.; Lee, S.; Honda, M.; Kannan, K.; Tekola-Ayele, F.; Buck Louis, G.M. Persistent organic pollutants and gestational diabetes: A multi-center prospective cohort study of healthy US women. *Environ. Int.* **2019**, *249–258*.
4. Tian, Y.-P.; Zeng, X.-W.; Bloom, M.S.; Lin, S.; Wang, S.-Q.; Yim, S.H.L.; Yang, M.; Chu, C.; Gurram, N.; Hu, L.-W.; et al. Isomers of perfluoroalkyl substances and overweight status among Chinese by sex status: Isomers of C8 Health Project in China. *Environ. Int.* **2019**, *124*, 130–138.
5. Jain, R.B.; Ducatman, A. Roles of gender and obesity in defining correlations between perfluoroalkyl substances and lipid/lipoproteins. *Sci. Total Environ.* **2019**, *653*, 74–81.
6. Liu, P.; Yang, F.; Wang, Y.; Yuan, Z. Perfluorooctanoic acid (PFOA) exposure in early life increases risk of childhood adiposity: A meta-analysis of prospective cohort studies. *Int. J. Environ. Res. Public Health* **2018**, *15*.
7. Bell, E.M.; Yeung, E.H.; Ma, W.; Kannan, K.; Sundaram, R.; Smarr, M.M.; Buck Louis, G.M. Concentrations of endocrine disrupting chemicals in newborn blood spots and infant outcomes in the upstate KIDS study. *Environ. Int.* **2018**, *121*, 232–239.
8. Mancini, F.R.; Rajaobelina, K.; Praud, D.; Dow, C.; Antignac, J.P.; Kvaskoff, M.; Severi, G.; Bonnet, F.; Boutron-Ruault, M.C.; Fagherazzi, G. Nonlinear associations between dietary exposures to perfluorooctanoic acid (PFOA) or perfluorooctane sulfonate (PFOS) and type 2 diabetes risk in women: Findings from the E3N cohort study. *Int. J. Hyg. Environ. Health* **2018**.
9. Jensen, R.C.; Glinborg, D.; Timmermann, C.A.G.; Nielsen, F.; Kyhl, H.B.; Andersen, H.R.; Grandjean, P.; Jensen, T.K.; Andersen, M. Perfluoroalkyl substances and glycemic status in pregnant Danish women: The Odense Child Cohort. *Environ. Int.* **2018**.
10. Miura, R.; Araki, A.; Miyashita, C.; Kobayashi, S.; Kobayashi, S.; Wang, S.L.; Chen, C.H.; Miyake, K.; Ishizuka, M.; Iwasaki, Y.; et al. An epigenome-wide study of cord blood DNA methylations in relation

- to prenatal perfluoroalkyl substance exposure: The Hokkaido study. *Environ. Int.* **2018**.
11. Sun, Q.; Zong, G.; Valvi, D.; Nielsen, F.; Coull, B.; Grandjean, P. Plasma Concentrations of Perfluoroalkyl Substances and Risk of Type 2 Diabetes: A Prospective Investigation among U.S. Women. *Environ. Health Perspect.* **2018**, *126*, 037001.
  12. Liu, G.; Dhana, K.; Furtado, J.D.; Rood, J.; Zong, G.; Liang, L.; Qi, L.; Bray, G.A.; DeJonge, L.; Coull, B.; et al. Perfluoroalkyl substances and changes in body weight and resting metabolic rate in response to weight-loss diets: A prospective study. *PLoS Med.* **2018**, *15*, e1002502.
  13. Mora, A.M.; Fleisch, A.F.; Rifas-Shiman, S.L.; Woo Baidal, J.A.; Pardo, L.; Webster, T.F.; Calafat, A.M.; Ye, X.; Oken, E.; Sagiv, S.K. Early life exposure to per- and polyfluoroalkyl substances and mid-childhood lipid and alanine aminotransferase levels. *Environ. Int.* **2018**, *111*, 1–13.
  14. Matilla-Santander, N.; Valvi, D.; Lopez-Espinosa, M.-J.; Manzano-Salgado, C.B.; Ballester, F.; Ibarluzea, J.; Santa-Marina, L.; Schettgen, T.; Guxens, M.; Sunyer, J.; et al. Exposure to Perfluoroalkyl Substances and Metabolic Outcomes in Pregnant Women: Evidence from the Spanish INMA Birth Cohorts. *Environ. Health Perspect.* **2017**, *125*, 117004.
  15. Yang, Q.; Guo, X.; Sun, P.; Chen, Y.; Zhang, W.; Gao, A. Association of serum levels of perfluoroalkyl substances (PFASs) with the metabolic syndrome (MetS) in Chinese male adults: A cross-sectional study. *Sci. Total Environ.* **2018**, *621*, 1542–1549.
  16. Khalil, N.; Ebert, J.R.; Honda, M.; Lee, M.; Nahhas, R.W.; Koskela, A.; Hangartner, T.; Kannan, K. Perfluoroalkyl substances, bone density, and cardio-metabolic risk factors in obese 8–12 year old children: A pilot study. *Environ. Res.* **2018**.
  17. Cardenas, A.; Gold, D.R.; Hauser, R.; Kleinman, K.P.; Hivert, M.-F.; Calafat, A.M.; Ye, X.; Webster, T.F.; Horton, E.S.; Oken, E. Plasma Concentrations of Per- and Polyfluoroalkyl Substances at Baseline and Associations with Glycemic Indicators and Diabetes Incidence among High-Risk Adults in the Diabetes Prevention Program Trial. *Environ. Health Perspect.* **2017**, *125*, 107001.
  18. Manzano-Salgado, C.B.; Casas, M.; Lopez-Espinosa, M.-J.; Ballester, F.; Iñiguez, C.; Martinez, D.; Romaguera, D.; Fernández-Barrés, S.; Santa-Marina, L.; Basterretxea, M.; et al. Prenatal Exposure to Perfluoroalkyl Substances and Cardiometabolic Risk in Children from the Spanish INMA Birth Cohort Study. *Environ. Health Perspect.* **2017**, *125*, 097018.
  19. Liu, H.S.; Wen, L.L.; Chu, P.L.; Lin, C.Y. Association among total serum isomers of perfluorinated chemicals, glucose homeostasis, lipid profiles, serum protein and metabolic syndrome in adults: NHANES, 2013–2014. *Environ. Pollut.* **2018**.
  20. Starling, A.P.; Adgate, J.L.; Hamman, R.F.; Kechris, K.; Calafat, A.M.; Ye, X.; Dabelea, D. Perfluoroalkyl Substances during Pregnancy and Offspring Weight and Adiposity at Birth: Examining Mediation by Maternal Fasting Glucose in the Healthy Start Study. *Environ. Health Perspect.* **2017**, *125*, 067016.

21. Kingsley, S.L.; Kelsey, K.T.; Butler, R.; Chen, A.; Eliot, M.N.; Romano, M.E.; Houseman, A.; Koestler, D.C.; Lanphear, B.P.; Yolton, K.; et al. Maternal serum PFOA concentration and DNA methylation in cord blood: A pilot study. *Environ. Res.* **2017**, *158*, 174–178.
22. Hartman, T.J.; Calafat, A.M.; Holmes, A.K.; Marcus, M.; Northstone, K.; Flanders, W.D.; Kato, K.; Taylor, E. V Prenatal Exposure to Perfluoroalkyl Substances and Body Fatness in Girls. *Child. Obes.* **2017**, *13*, 222–230.
23. Lauritzen, H.B.; Larose, T.L.; Øien, T.; Sandanger, T.M.; Odland, J.Ø.; van de Bor, M.; Jacobsen, G.W. Maternal serum levels of perfluoroalkyl substances and organochlorines and indices of fetal growth: a Scandinavian case-cohort study. *Pediatr. Res.* **2017**, *81*, 33–42.
24. Remy, S.; Govarts, E.; Wens, B.; De Boever, P.; Den Hond, E.; Croes, K.; Sioen, I.; Baeyens, W.; van Larebeke, N.; Koppe, J.; et al. Metabolic targets of endocrine disrupting chemicals assessed by cord blood transcriptome profiling. *Reprod. Toxicol.* **2016**.
25. Fleisch, A.F.; Rifas-Shiman, S.L.; Mora, A.M.; Calafat, A.M.; Ye, X.; Luttmann-Gibson, H.; Gillman, M.W.; Oken, E.; Sagiv, S.K. Early-Life Exposure to Perfluoroalkyl Substances and Childhood Metabolic Function. *Environ. Health Perspect.* **2017**, *125*, 481–487.
26. Domazet, S.L.; Grøntved, A.; Timmermann, A.G.; Nielsen, F.; Jensen, T.K. Longitudinal associations of exposure to perfluoroalkylated substances in childhood and adolescence and indicators of adiposity and glucose metabolism 6 and 12 years later: The European youth heart study. *Diabetes Care* **2016**, *39*, 1745–1751.
27. Mora, A.M.; Oken, E.; Rifas-Shiman, S.L.; Webster, T.F.; Gillman, M.W.; Calafat, A.M.; Ye, X.; Sagiv, S.K. Prenatal Exposure to Perfluoroalkyl Substances and Adiposity in Early and Mid-Childhood. *Environ. Health Perspect.* **2017**, *125*, 467–473.
28. Conway, B.; Innes, K.E.; Long, D. Perfluoroalkyl substances and beta cell deficient diabetes. *J. Diabetes Complications* **2016**, *30*, 993–8.
29. Su, T.C.; Kuo, C.C.; Hwang, J.J.; Lien, G.W.; Chen, M.F.; Chen, P.C. Serum perfluorinated chemicals, glucose homeostasis and the risk of diabetes in working-aged Taiwanese adults. *Environ. Int.* **2016**.
30. Braun, J.M.; Chen, A.; Romano, M.E.; Calafat, A.M.; Webster, G.M.; Yolton, K.; Lanphear, B.P. Prenatal perfluoroalkyl substance exposure and child adiposity at 8 years of age: The HOME study. *Obesity (Silver Spring)*. **2016**, *24*, 231–7.
31. Liu, H.; Li, J.; Xia, W.; Zhang, B.; Peng, Y.; Li, Y.; Zhou, Y.; Fang, J.; Zhao, H.; Jiang, Y.; et al. Blood pressure changes during pregnancy in relation to urinary paraben, triclosan and benzophenone concentrations: A repeated measures study. *Environ. Int.* **2019**, *122*, 185–192.
32. Wu, C.; Li, J.; Xia, W.; Li, Y.; Zhang, B.; Zhou, A.; Hu, J.; Li, C.; Zhao, H.; Jiang, M.; et al. The association of repeated measurements of prenatal exposure to triclosan with fetal and early-childhood growth.



- Environ. Int.* **2018**, *120*, 54–62.
33. Kalloo, G.; Calafat, A.M.; Chen, A.; Yolton, K.; Lanphear, B.P.; Braun, J.M. Early life Triclosan exposure and child adiposity at 8 Years of age: A prospective cohort study. *Environ. Heal. A Glob. Access Sci. Source* **2018**, *17*.
  34. Ouyang, F.; Tang, N.; Zhang, H.-J.; Wang, X.; Zhao, S.; Wang, W.; Zhang, J.; Cheng, W. Maternal urinary triclosan level, gestational diabetes mellitus and birth weight in Chinese women. *Sci. Total Environ.* **2018**, *626*, 451–457.
  35. Ferguson, K.K.; Meeker, J.D.; Cantonwine, D.E.; Mukherjee, B.; Pace, G.G.; Weller, D.; McElrath, T.F. Environmental phenol associations with ultrasound and delivery measures of fetal growth. *Environ. Int.* **2018**, *112*, 243–250.
  36. Shapiro, G.D.; Arbuckle, T.E.; Ashley-Martin, J.; Fraser, W.D.; Fisher, M.; Bouchard, M.F.; Monnier, P.; Morisset, A.-S.; Ettinger, A.S.; Dodds, L. Associations between maternal triclosan concentrations in early pregnancy and gestational diabetes mellitus, impaired glucose tolerance, gestational weight gain and fetal markers of metabolic function. *Environ. Res.* **2018**, *161*, 554–561.
  37. Huo, W.; Xia, W.; Wu, C.; Zhu, Y.; Zhang, B.; Wan, Y.; Zhou, A.; Qian, Z.; Chen, Z.; Jiang, Y.; et al. Urinary level of triclosan in a population of Chinese pregnant women and its association with birth outcomes. *Environ. Pollut.* **2018**, *233*, 872–879.
  38. Deierlein, A.L.; Wolff, M.S.; Pajak, A.; Pinney, S.M.; Windham, G.C.; Galvez, M.P.; Rybak, M.; Calafat, A.M.; Kushi, L.H.; Biro, F.M.; et al. Phenol Concentrations During Childhood and Subsequent Measures of Adiposity Among Young Girls. *Am. J. Epidemiol.* **2017**, *186*, 581–592.
  39. Geer, L.A.; Pycke, B.F.G.; Waxenbaum, J.; Sherer, D.M.; Abulafia, O.; Halden, R.U. Association of birth outcomes with fetal exposure to parabens, triclosan and triclocarban in an immigrant population in Brooklyn, New York. *J. Hazard. Mater.* **2017**, *323*, 177–183.
  40. Buckley, J.P.; Herring, A.H.; Wolff, M.S.; Calafat, A.M.; Engel, S.M. Prenatal exposure to environmental phenols and childhood fat mass in the Mount Sinai Children’s Environmental Health Study. *Environ. Int.* **2016**, *91*, 350–6.
  41. Lassen, T.H.; Frederiksen, H.; Kyhl, H.B.; Swan, S.H.; Main, K.M.; Andersson, A.-M.; Lind, D.V.; Husby, S.; Wohlfahrt-Veje, C.; Skakkebaek, N.E.; et al. Prenatal Triclosan Exposure and Anthropometric Measures Including Anogenital Distance in Danish Infants. *Environ. Health Perspect.* **2016**, *124*, 1261–8.
  42. Donat-Vargas, C.; Akesson, A.; Tornevi, A.; Wennberg, M.; Sommar, J.; Kiviranta, H.; Rantakokko, P.; Bergdahl, I.A. Persistent organochlorine pollutants in plasma, blood pressure, and hypertension in a longitudinal study. *Hypertension* **2018**, *71*, 1258–1268.
  43. Zong, G.; Valvi, D.; Coull, B.; Göen, T.; Hu, F.B.; Nielsen, F.; Grandjean, P.; Sun, Q. Persistent organic pollutants and risk of type 2 diabetes: A prospective investigation among middle-aged women in

- Nurses' Health Study II. *Environ. Int.* **2018**, *114*, 334–342.
44. Coker, E.; Chevrier, J.; Rauch, S.; Bradman, A.; Obida, M.; Crause, M.; Bornman, R.; Eskenazi, B. Association between prenatal exposure to multiple insecticides and child body weight and body composition in the VHEMBE South African birth cohort. *Environ. Int.* **2018**, *113*, 122–132.
  45. La Merrill, M.A.; Lind, P.M.; Salihovic, S.; van Bavel, B.; Lind, L. The association between p,p'-DDE levels and left ventricular mass is mainly mediated by obesity. *Environ. Res.* **2018**, *160*, 541–546.
  46. Cano-Sancho, G.; Salmon, A.G.; La Merrill, M.A. Association between Exposure to p,p'-DDT and Its Metabolite p,p'-DDE with Obesity: Integrated Systematic Review and Meta-Analysis. *Environ. Health Perspect.* **2017**, *125*, 096002.
  47. Warner, M.; Ye, M.; Harley, K.; Kogut, K.; Bradman, A.; Eskenazi, B. Prenatal DDT exposure and child adiposity at age 12: The CHAMACOS study. *Environ. Res.* **2017**, *159*, 606–612.
  48. Rosenbaum, P.F.; Weinstock, R.S.; Silverstone, A.E.; Sjödin, A.; Pavuk, M. Metabolic syndrome is associated with exposure to organochlorine pesticides in Anniston, AL, United States. *Environ. Int.* **2017**, *108*, 11–21.
  49. Valvi, D.; Oulhote, Y.; Weihe, P.; Dalgård, C.; Bjerve, K.S.; Steuerwald, U.; Grandjean, P. Gestational diabetes and offspring birth size at elevated environmental pollutant exposures. *Environ. Int.* **2017**, *107*, 205–215.
  50. Singh, K.; Chan, H.M. Persistent organic pollutants and diabetes among Inuit in the Canadian Arctic. *Environ. Int.* **2017**, *101*, 183–189.
  51. Artacho-Cordón, F.; León, J.; Sáenz, J.M.; Fernández, M.F.; Martín-Olmedo, P.; Olea, N.; Arrebola, J.P. Contribution of Persistent Organic Pollutant Exposure to the Adipose Tissue Oxidative Microenvironment in an Adult Cohort: A Multipollutant Approach. *Environ. Sci. Technol.* **2016**, *50*, 13529–13538.
  52. Xu, C.; Yin, S.; Tang, M.; Liu, K.; Yang, F.; Liu, W. Environmental exposure to DDT and its metabolites in cord serum: Distribution, enantiomeric patterns, and effects on infant birth outcomes. *Sci. Total Environ.* **2017**, *580*, 491–498.
  53. Carrizo, D.; Chevallier, O.P.; Woodside, J. V; Brennan, S.F.; Cantwell, M.M.; Cuskelly, G.; Elliott, C.T. Untargeted metabolomic analysis of human serum samples associated with exposure levels of Persistent organic pollutants indicate important perturbations in Sphingolipids and Glycerophospholipids levels. *Chemosphere* **2017**, *168*, 731–738.
  54. Du, J.; Gridneva, Z.; Gay, M.C.L.; Trengove, R.D.; Hartmann, P.E.; Geddes, D.T. Pesticides in human milk of Western Australian women and their influence on infant growth outcomes: A cross-sectional study. *Chemosphere* **2017**, *167*, 247–254.
  55. Aminov, Z.; Haase, R.; Rej, R.; Schymura, M.J.; Santiago-Rivera, A.; Morse, G.; DeCaprio, A.; Carpenter,

- D.O.; Akwesasne Task Force on the Environment Diabetes Prevalence in Relation to Serum Concentrations of Polychlorinated Biphenyl (PCB) Congener Groups and Three Chlorinated Pesticides in a Native American Population. *Environ. Health Perspect.* **2016**, *124*, 1376–83.
56. Salihovic, S.; Ganna, A.; Fall, T.; Broeckling, C.D.; Prenni, J.E.; van Bavel, B.; Lind, P.M.; Ingelsson, E.; Lind, L. The metabolic fingerprint of p,p'-DDE and HCB exposure in humans. *Environ. Int.* **2016**, *88*, 60–66.
57. Mansouri, V.; Ebrahimpour, K.; Poursafa, P.; Riahi, R.; Shoshtari-Yeganeh, B.; Hystad, P.; Kelishadi, R. Exposure to phthalates and bisphenol A is associated with higher risk of cardiometabolic impairment in normal weight children. *Environ. Sci. Pollut. Res. Int.* **2019**, *26*, 18604–18614.
58. Soundararajan, A.; Prabu, P.; Mohan, V.; Gibert, Y.; Balasubramanyam, M. Novel insights of elevated systemic levels of bisphenol-A (BPA) linked to poor glycemic control, accelerated cellular senescence and insulin resistance in patients with type 2 diabetes. *Mol. Cell. Biochem.* **2019**, *458*, 171–183.
59. Chang, C.-H.; Huang, Y.-F.; Wang, P.-W.; Lai, C.-H.; Huang, L.-W.; Chen, H.-C.; Lin, M.-H.; Yang, W.; Mao, I.-F.; Chen, M.-L. Associations between prenatal exposure to bisphenol a and neonatal outcomes in a Taiwanese cohort study: Mediated through oxidative stress? *Chemosphere* **2019**, *226*, 290–297.
60. Shim, Y.H.; Ock, J.W.; Kim, Y.-J.; Kim, Y.; Kim, S.Y.; Kang, D. Association between Heavy Metals, Bisphenol A, Volatile Organic Compounds and Phthalates and Metabolic Syndrome. *Int. J. Environ. Res. Public Health* **2019**, *16*.
61. Song, S.; Duan, Y.; Zhang, T.; Zhang, B.; Zhao, Z.; Bai, X.; Xie, L.; He, Y.; Ouyang, J.-P.; Huang, X.; et al. Serum concentrations of bisphenol A and its alternatives in elderly population living around e-waste recycling facilities in China: Associations with fasting blood glucose. *Ecotoxicol. Environ. Saf.* **2019**, *169*, 822–828.
62. Duan, Y.; Yao, Y.; Wang, B.; Han, L.; Wang, L.; Sun, H.; Chen, L. Association of urinary concentrations of bisphenols with type 2 diabetes mellitus: A case-control study. *Environ. Pollut.* **2018**, 1719–1726.
63. Hwang, S.; Lim, J.-E.; Choi, Y.; Jee, S.H. Bisphenol A exposure and type 2 diabetes mellitus risk: a meta-analysis. *BMC Endocr. Disord.* **2018**, *18*, 81.
64. Rahmani, S.; Pour Khalili, N.; Khan, F.; Hassani, S.; Ghafour-Boroujerdi, E.; Abdollahi, M. Bisphenol A: What lies beneath its induced diabetes and the epigenetic modulation? *Life Sci.* **2018**, *214*, 136–144.
65. Li, A.J.; Xue, J.; Lin, S.; Al-Malki, A.L.; Al-Ghamdi, M.A.; Kumosani, T.A.; Kannan, K. Urinary concentrations of environmental phenols and their association with type 2 diabetes in a population in Jeddah, Saudi Arabia. *Environ. Res.* **2018**, *166*, 544–552.
66. Lee, I.; Kim, S.; Kim, K.-T.; Kim, S.; Park, S.; Lee, H.; Jeong, Y.; Lim, J.-E.; Moon, H.-B.; Choi, K. Bisphenol A exposure through receipt handling and its association with insulin resistance among female cashiers. *Environ. Int.* **2018**, *117*, 268–275.

67. Bellavia, A.; Cantonwine, D.E.; Meeker, J.D.; Hauser, R.; Seely, E.W.; McElrath, T.F.; James-Todd, T. Pregnancy urinary bisphenol-A concentrations and glucose levels across BMI categories. *Environ. Int.* **2018**, *113*, 35–41.
68. Shu, X.; Tang, S.; Peng, C.; Gao, R.; Yang, S.; Luo, T.; Cheng, Q.; Wang, Y.; Wang, Z.; Zhen, Q.; et al. Bisphenol A is not associated with a 5-year incidence of type 2 diabetes: a prospective nested case-control study. *Acta Diabetol.* **2018**, *55*, 369–375.
69. Wang, X.; Wang, X.; Chen, Q.; Luo, Z.-C.; Zhao, S.; Wang, W.; Zhang, H.-J.; Zhang, J.; Ouyang, F. Urinary Bisphenol A Concentration and Gestational Diabetes Mellitus in Chinese Women. *Epidemiology* **2017**, *28 Suppl 1*, S41–S47.
70. Chiu, Y.H.; Mínguez-Alarcón, L.; Ford, J.B.; Keller, M.; Seely, E.W.; Messerlian, C.; Petrozza, J.; Williams, P.L.; Ye, X.; Calafat, A.M.; et al. Trimester-specific urinary bisphenol a concentrations and blood glucose levels among pregnant women from a fertility clinic. *J. Clin. Endocrinol. Metab.* **2017**, *102*, 1350–1357.
71. Piecha, R.; Svačina, Š.; Malý, M.; Vrbík, K.; Lacinová, Z.; Haluzík, M.; Pavloušková, J.; Vavrouš, A.; Matějková, D.; Müllerová, D.; et al. Urine Levels of Phthalate Metabolites and Bisphenol A in Relation to Main Metabolic Syndrome Components: Dyslipidemia, Hypertension and Type 2 Diabetes. A Pilot Study. *Cent. Eur. J. Public Health* **2016**, *24*, 297–301.
72. Stojanoska, M.M.; Milosevic, N.; Milic, N.; Abenavoli, L. The influence of phthalates and bisphenol A on the obesity development and glucose metabolism disorders. *Endocrine* **2017**, *55*, 666–681.
73. Watkins, D.J.; Wellenius, G.A.; Butler, R.A.; Bartell, S.M.; Fletcher, T.; Kelsey, K.T. Associations between serum perfluoroalkyl acids and LINE-1 DNA methylation. *Environ. Int.* **2014**, *63*, 71–6.
74. De Craemer, S.; Croes, K.; van Larebeke, N.; De Henauw, S.; Schoeters, G.; Govarts, E.; Loots, I.; Nawrot, T.; Nelen, V.; Den Hond, E.; et al. Metals, hormones and sexual maturation in Flemish adolescents in three cross-sectional studies (2002–2015). *Environ. Int.* **2017**, *102*, 190–199.
75. Schoeters, G.; Govarts, E.; Bruckers, L.; Den Hond, E.; Nelen, V.; De Henauw, S.; Sioen, I.; Nawrot, T.S.; Plusquin, M.; Vriens, A.; et al. Three cycles of human biomonitoring in Flanders – Time trends observed in the Flemish Environment and Health Study. *Int. J. Hyg. Environ. Health* **2017**, *220*, 36–45.
76. Baeyens, W.; Vrijens, J.; Gao, Y.; Croes, K.; Schoeters, G.; Den Hond, E.; Sioen, I.; Bruckers, L.; Nawrot, T.; Nelen, V.; et al. Trace metals in blood and urine of newborn/mother pairs, adolescents and adults of the Flemish population (2007–2011). *Int. J. Hyg. Environ. Health* **2014**, *217*, 878–890.
77. Croes, K.; Den Hond, E.; Bruckers, L.; Loots, I.; Morrens, B.; Nelen, V.; Colles, A.; Schoeters, G.; Sioen, I.; Covaci, A.; et al. Monitoring chlorinated persistent organic pollutants in adolescents in Flanders (Belgium): Concentrations, trends and dose-effect relationships (FLEHS II). *Environ. Int.* **2014**, *71*, 20–28.
78. Den Hond, E.; Paulussen, M.; Geens, T.; Bruckers, L.; Baeyens, W.; David, F.; Dumont, E.; Loots, I.;

- Morrens, B.; de Bellevaux, B.N.; et al. Biomarkers of human exposure to personal care products: Results from the Flemish Environment and Health Study (FLEHS 2007-2011). *Sci. Total Environ.* **2013**, *463–464*, 102–110.
79. Vrijens, J.; Leermakers, M.; Stalpaert, M.; Schoeters, G.; Den Hond, E.; Bruckers, L.; Colles, A.; Nelen, V.; Van Den Mieroop, E.; Van Larebeke, N.; et al. Trace metal concentrations measured in blood and urine of adolescents in Flanders, Belgium: Reference population and case studies Genk-Zuid and Menen. *Int. J. Hyg. Environ. Health* **2014**, *217*, 515–527.
80. Koppen, G.; Covaci, A.; Van Cleuvenbergen, R.; Schepens, P.; Winneke, G.; Nelen, V.; van Larebeke, N.; Vlietinck, R.; Schoeters, G.; Cleuvenbergen, R. Van Persistent organochlorine pollutants in human serum of 50 – 65 years old women in the Flanders Environmental and Health Study ( FLEHS ). Part 1 : concentrations and regional differences. *Chemosphere* **2002**, *48*, 811–825.
81. Koppen, G.; Den Hond, E.; Nelen, V.; Van De Mieroop, E.; Bruckers, L.; Bilau, M.; Keune, H.; Van Larebeke, N.; Covaci, A.; Van De Weghe, H.; et al. Organochlorine and heavy metals in newborns: Results from the Flemish Environment and Health Survey (FLEHS 2002-2006). *Environ. Int.* **2009**, *35*, 1015–1022.
82. Bai, X.-Y.; Lu, S.-Y.; Xie, L.; Zhang, B.; Song, S.-M.; He, Y.; Ouyang, J.-P.; Zhang, T. A pilot study of metabolites of organophosphorus flame retardants in paired maternal urine and amniotic fluid samples: potential exposure risks of tributyl phosphate to pregnant women. *Environ. Sci. Process. Impacts* **2019**, *21*, 124–132.
83. Zhang, T.; Bai, X.-Y.; Lu, S.-Y.; Zhang, B.; Xie, L.; Zheng, H.-C.; Jiang, Y.-C.; Zhou, M.-Z.; Zhou, Z.-Q.; Song, S.-M.; et al. Urinary metabolites of organophosphate flame retardants in China: Health risk from tris(2-chloroethyl) phosphate (TCEP) exposure. *Environ. Int.* **2018**, *121*, 1363–1371.
84. Thomas, M.B.; Stapleton, H.M.; Dills, R.L.; Violette, H.D.; Christakis, D.A.; Sathyanarayana, S. Demographic and dietary risk factors in relation to urinary metabolites of organophosphate flame retardants in toddlers. *Chemosphere* **2017**.
85. Feng, L.; Ouyang, F.; Liu, L.; Wang, X.; Wang, X.; Li, Y.-J.; Murtha, A.; Shen, H.; Zhang, J.; Zhang, J.J. Levels of Urinary Metabolites of Organophosphate Flame Retardants, TDCIPP, and TPHP, in Pregnant Women in Shanghai. *J. Environ. Public Health* **2016**, *2016*, 9416054.
86. Liu, L.-Y.; He, K.; Hites, R.A.; Salamova, A. Hair and Nails as Noninvasive Biomarkers of Human Exposure to Brominated and Organophosphate Flame Retardants. *Environ. Sci. Technol.* **2016**, *50*, 3065–73.
87. Kannan, K.; Senthilkumar, K.; Giesy, J.P. Occurrence of butyltin compounds in human blood. *Environ. Sci. Technol.* **1999**, *33*, 1776–1779.
88. Rantakokko, P.; Kumar, E.; Braber, J.; Huang, T.; Kiviranta, H.; Cequier, E.; Thomsen, C. Concentrations of brominated and phosphorous flame retardants in Finnish house dust and insights into children's

- exposure. *Chemosphere* **2019**, *99*–107.
89. Verma, N.; Chouhan, U. Chemometric Modelling of PPAR- $\alpha$  and PPAR- $\gamma$  Dual Agonists for the Treatment of Type-2 Diabetes. *Curr. Sci.* **2016**, *111*, 356.
90. Vallianatou, T.; Lambrinidis, G.; Giaginis, C.; Mikros, E.; Tsantili-Kakoulidou, A. Analysis of PPAR- $\alpha/\gamma$  Activity by Combining 2-D QSAR and Molecular Simulation. *Mol. Inform.* **2013**, *32*, 431–45.
91. Al Sharif, M.; Tsakovska, I.; Pajeva, I.; Alov, P.; Fioravanzo, E.; Bassan, A.; Kovarich, S.; Yang, C.; Mostrag-Szlichtyng, A.; Vitcheva, V.; et al. The application of molecular modelling in the safety assessment of chemicals: A case study on ligand-dependent PPAR $\gamma$  dysregulation. *Toxicology* **2017**, *392*, 140–154.
92. Yin, C.; Yang, X.; Wei, M.; Liu, H. Predictive models for identifying the binding activity of structurally diverse chemicals to human pregnane X receptor. *Environ. Sci. Pollut. Res. Int.* **2017**, *24*, 20063–20071.
93. Dybdahl, M.; Nikolov, N.G.; Wedebye, E.B.; Jónsdóttir, S.Ó.; Niemelä, J.R. QSAR model for human pregnane X receptor (PXR) binding: screening of environmental chemicals and correlations with genotoxicity, endocrine disruption and teratogenicity. *Toxicol. Appl. Pharmacol.* **2012**, *262*, 301–9.
94. Kato, H.; Yamaotsu, N.; Iwazaki, N.; Okamura, S.; Kume, T.; Hirono, S. Precise prediction of activators for the human constitutive androstane receptor using structure-based three-dimensional quantitative structure–activity relationship methods. *Drug Metab. Pharmacokinet.* **2017**, *32*, 179–188.
95. Spreafico, M.; Smiesko, M.; Peristera, O.; Rossato, G.; Vedani, A. Probing Small-Molecule Binding to the Liver-X Receptor: A Mixed-Model QSAR Study. *Mol. Inform.* **2010**, *29*, 27–36.
96. Chen, M.; Yang, F.; Kang, J.; Gan, H.; Yang, X.; Lai, X.; Gao, Y. Identification of Potent LXR $\beta$ -Selective Agonists without LXR $\alpha$  Activation by In Silico Approaches. *Molecules* **2018**, *23*.
97. Chen, Y.; Yang, H.; Wu, Z.; Liu, G.; Tang, Y.; Li, W. Prediction of Farnesoid X Receptor Disruptors with Machine Learning Methods. *Chem. Res. Toxicol.* **2018**, *31*, 1128–1137.
98. Hsu, C.-W.; Hsieh, J.-H.; Huang, R.; Pijnenburg, D.; Khuc, T.; Hamm, J.; Zhao, J.; Lynch, C.; van Beuningen, R.; Chang, X.; et al. Differential modulation of FXR activity by chlorophacinone and ivermectin analogs. *Toxicol. Appl. Pharmacol.* **2016**, *313*, 138–148.

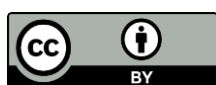

Supplement: ijms-21-03480-s001.pdf [file ijms-21-03480-s001.pdf]
